# Supplementary material
Source: MDPI journal article supplement (https://www.mdpi.com/2297-8739/9/12/435)
Supplement: s1 [file s1 › separations-2071341-supplementary.pdf]

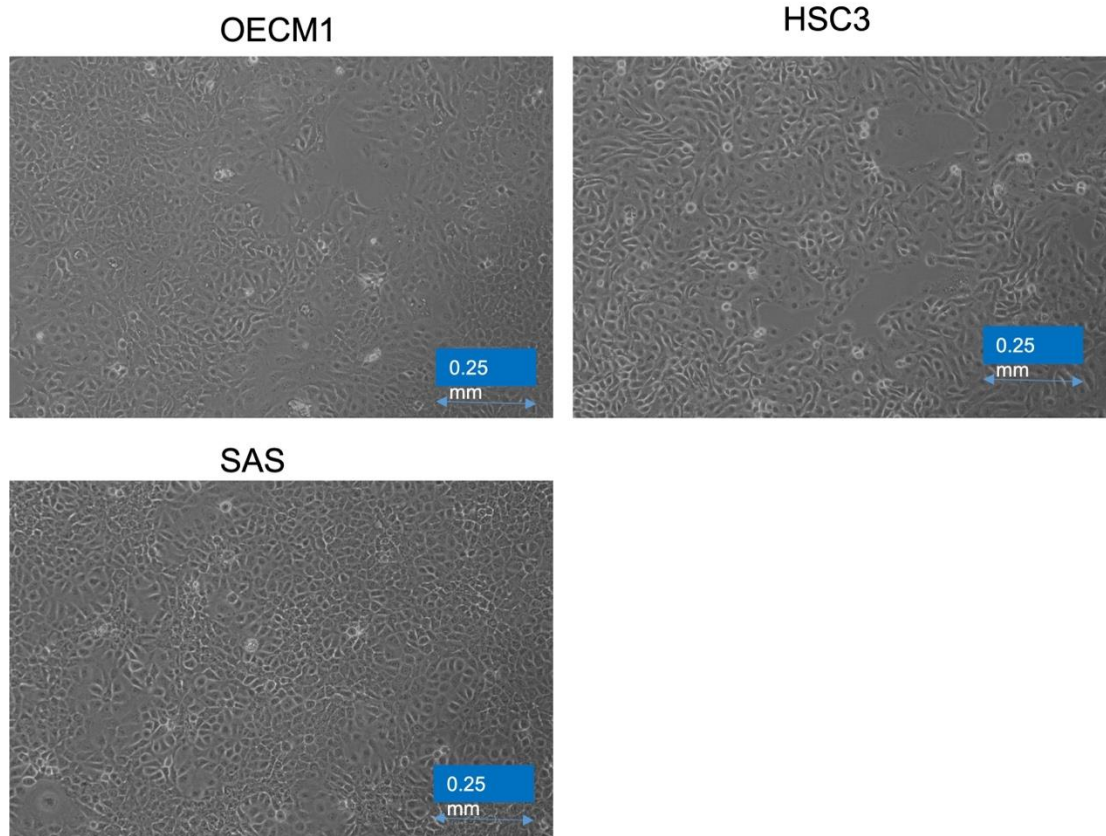

**Supplementary Figure S1. The morphology of OSCC cell lines**

SAS cells have the property of piling up growth and apparent aggregation after cell detachment for passage. Therefore, a higher percentage of PEG will precipitate a pile of SAS cells and the lysis efficiency will reduce in downstream applications.

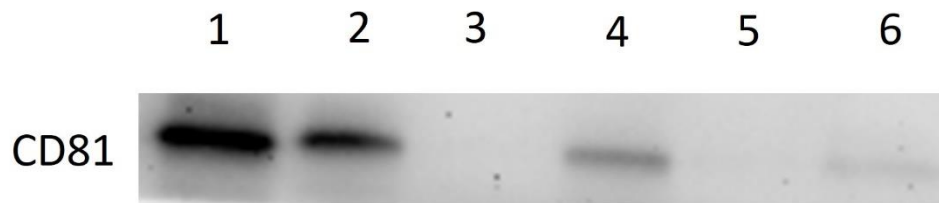

| Order of CD81 intensity | No. | Exosomal particle number/ ml |
|-------------------------|-----|------------------------------|
| 2                       | 1   | 4.17e+10 +/- 9.94e+09        |
| 1                       | 2   | 5.00e+10 +/- 4.40e+09        |
| 6                       | 3   | 5.96e+09 +/- 3.52e+08        |
| 3                       | 4   | 3.99e+10 +/- 2.02e+09        |
| 5                       | 5   | 1.02e+10 +/- 4.34e+08        |
| 4                       | 6   | 2.24e+10 +/- 2.14e+09        |

**Supplementary Data S1. The intensity of CD81 was positively correlated to exosome particle number.**
